1

2                   Profile of the *tprK* gene in primary syphilis patients based on  
3                                           next-generation sequencing

4   Dan Liu<sup>1,2¶</sup>, Man-Li Tong<sup>1,2¶</sup>, Xi Luo<sup>1¶</sup>, Li-Li Liu<sup>1,2</sup>, Li-Rong Lin<sup>1,2</sup>, Hui-Lin Zhang<sup>1</sup>,  
5   Yong Lin<sup>1</sup>, Jian-Jun Niu<sup>1,3</sup>, and Tian-Ci Yang<sup>1,2\*</sup>

6   <sup>1</sup> Zhongshan Hospital, Medical College of Xiamen University, Xiamen, China

7   <sup>2</sup> Institute of Infectious Disease, Medical College of Xiamen University, Xiamen,  
8   Fujian Province, China

9   <sup>3</sup> Zhongshan Hospital, Fujian Medical University, Xiamen, China

10

11   \* Corresponding author: Tian-Ci Yang

12   E-mail: [yangtianci@xmu.edu.cn](mailto:yangtianci@xmu.edu.cn)

13   ¶These authors contributed equally to this work.

14   **Short title:** Profile of the *tprK* gene

15

## 16 **Abstract**

### 17 **Background**

18 The highly variable *tprK* gene of *Treponema pallidum* has been acknowledged to be  
19 the cause of persistent infection. Previous studies mainly focused on the heterogeneity  
20 in *tprK* in propagated strains using a clone-based Sanger approach. Few studies have  
21 investigated *tprK* directly from clinical samples using deep sequencing.

### 22 **Methods/Principal findings**

23 We conducted a comprehensive analysis of 14 primary syphilis clinical isolates of *T.*  
24 *pallidum* via next-generation sequencing to gain better insight into the profile of *tprK*  
25 in primary syphilis patients. Our results based on primary syphilis clinical samples  
26 showed that there was a mixture of distinct sequences within each V region of *tprK*.  
27 Except for the predominant sequence for each region as previously reported using the  
28 clone-based Sanger approach, there were many minor variants of all strains that were  
29 mainly observed at a frequency of 1-5%. Interestingly, the identified distinct  
30 sequences within the regions were variable in length and differed only by 3 bp or  
31 multiples of 3 bp. In addition, amino acid sequence consistency within each region  
32 was found between the 14 strains. Among the regions, the sequence IASDGGAIKH  
33 in V1 and the sequence DVGHKKENAANVNGTVGA in V4 showed a high stability  
34 of inter-strain redundancy.

### 35 **Conclusions**

36 The seven V regions of the *tprK* gene in primary syphilis infection demonstrated high

37 diversity; they generally contained a high proportion sequence and numerous  
38 low-frequency minor variants, most of which are far below the detection limit of  
39 Sanger sequencing. The rampant variation in each region was regulated by a strict  
40 gene conversion mechanism that maintained the length difference to 3 bp or multiples  
41 of 3 bp. The highly stable sequence of inter-strain redundancy may indicate that the  
42 sequences play a critical role in *T. pallidum* virulence. These highly stable peptides  
43 are also likely to be potential targets for vaccine development.

44

45 **Author summary**

46 Variations in *tprK* have been acknowledged to be the major contributors to persistent  
47 *Treponema pallidum* infections. Previous studies were based on the clone-based  
48 Sanger approach, and most of them were performed in propagated strains using  
49 rabbits, which could not reflect the actual heterogeneous characteristics of *tprK* *in*  
50 *vivo*. In the present study, we employed next-generation sequencing (NGS) to explore  
51 the profile of *tprK* directly from 14 patients with primary syphilis. Our results showed  
52 a mixture of distinct sequences within each V region of *tprK* in these clinical samples.  
53 First, the length of identified distinct sequences within the region was variable, which  
54 differed by only 3 bp or multiples of 3 bp. Then, among the mixtures, a predominant  
55 sequence was usually observed for each region, and the remaining minor variants  
56 were mainly observed at a frequency of 1-5%. In addition, there was a scenario of  
57 amino acid sequence consistency within the regions between the 14 primary syphilis  
58 strains. The identification of the profile of *tprK* in the context of human primary  
59 syphilis infection contributes to further exploration of the pathogenesis of syphilis.

## 60 **Introduction**

61 Syphilis, caused by *Treponema pallidum*, is an ancient sexually transmitted disease  
62 that dates back to the 15<sup>th</sup> century and is a public health threat that cannot be  
63 neglected [1, 2]. The completion of the first whole genome sequencing of the Nichols  
64 strain of *T. pallidum* provides a wealth of information about the characteristics of this  
65 pathogen, and since then the sequence of other experimental treponemal strains has  
66 also been released [3-8]. These particular achievements have revealed slight  
67 variations between different strains in a small genome (~1.1 Mb), and most of the  
68 genetic diversity occurs in six genomic regions, including a polymorphic multigene  
69 family encoding 12 paralogous proteins (*tpr A* through *tprL*), highlighting most likely  
70 a factor in the pathogenesis of *T. pallidum* [2, 6, 9].

71 Within the *tpr* family, the antigen-coding *tprK* has been found to be the direct  
72 target of the human immune response [10]. Several remarkable studies performed in  
73 the rabbit model have demonstrated that the *tprK* gene possesses high genetic  
74 diversity at both the intra- and inter-strain levels, and the genetic variation in *tprK* is  
75 localized to seven variable regions (V1-V7) flanked by highly conserved domains  
76 [11-13]. Theoretically, through gene conversion, variations in the V regions would  
77 generate millions of chimeric *tprK* variants, resulting in a constant alteration in the *T.*  
78 *pallidum* antigenic profile [14]. Therefore, the *tprK* gene is acknowledged to have a  
79 pivotal role in immune evasion and pathogen persistence [15-17].

80 Previous studies have been mainly based on the clone-based Sanger approach;  
81 when using this approach, one would inevitably encounter a bottleneck in clone

82 selection where minor variants, especially at low frequencies, are lost; consequently,  
83 the complete mutation profile of *tprK* is not fully understood. In addition, few studies  
84 have explored how *tprK* diversifies in the context of human infection, thus reflecting  
85 the actual heterogeneous characteristics of *tprK in vivo*, with the exception of one  
86 recent publication that reported on whole genome sequencing directly from clinical  
87 samples of *T. pallidum* [18]. Research has shown that after being cultured in rabbits,  
88 the genes of *T. pallidum* mutate and cannot retain their naïve characteristics, let alone  
89 the *tprK* gene, which has rampant potential to vary [19].

90 In the present study, we seek to systematically reveal the profile of *tprK* in *T.*  
91 *pallidum* directly from patients with primary syphilis by employing next-generation  
92 sequencing (NGS), thus providing important insights into the understanding of the  
93 diversity of *tprK* directly from primary syphilis patients and contributing to further  
94 explorations of the mechanisms of long-term *T. pallidum* infection.

## 95 **Methods**

### 96 **Ethics statement**

97 Written consent was obtained with signatures from all patients in accordance with  
98 institutional guidelines prior to the study. The study was approved by the Ethics  
99 Committee of Zhongshan Hospital, Xiamen University, after a formal hearing and  
100 was in conformance with the Declaration of Helsinki.

### 101 **Sample collection**

102 Swab samples were obtained from the skin lesions of 14 patients (X-1~14) with  
103 primary syphilis. The clinical diagnosis of syphilis was based on the US Centers for  
104 Disease Control and Prevention (CDC) [20] and the European CDC (ECDC) [21].

### 105 **Isolation of DNA**

106 Treponemal DNA was extracted from the swab samples using the QIAamp DNA  
107 Mini Kit (Qiagen, Inc., Valencia, CA, USA) according to the manufacturer's  
108 instructions, and careful precautions were implemented to avoid DNA  
109 cross-contamination between isolates [22]. Each sample was quantified by targeting  
110 *tp0574* through qPCR using a 96-well reaction plate with a ViiA 7 Real-Time PCR  
111 System (Applied Biosystems, USA). A standard curve was constructed using 10-fold  
112 serial dilutions of cloned plasmids (for *tp0574*) generated through TOPO TA  
113 technology (Invitrogen, Carlsbad, CA, USA) and transformation of DH5 $\alpha$   
114 *Escherichia coli* cells [23]. The DNA samples that tested positive were stored at  
115 -20°C for further processing.

### 116 **Segmented amplification of the *tprK* gene**

117 First, the extracted DNA was directly used in the amplification of the *tprK* full open  
118 reading frame (ORF). The primers used for the amplification are listed in Table 1. For  
119 amplification, KOD FX Neo polymerase (Toyobo, Osaka, Japan) was used. The  
120 reaction mixture contained 25  $\mu\text{L}$  of 2 $\times$  PCR buffer, 0.4 mM deoxynucleoside  
121 triphosphates, 0.3  $\mu\text{M}$  of each primer, 1 U of KOD FX Neo polymerase, and 5  $\mu\text{L}$  of  
122 genomic DNA in a final volume of 50  $\mu\text{L}$ . The cycling conditions were as follows:  
123 94°C for 2 min, followed by 40 cycles of 98°C for 10 s, 60°C for 30 s, and 68°C for  
124 30 s. Then, the amplicons were gel purified and stored at -20°C for further processing  
125 as the next segmented amplification template.

126 Second, the *tprK* ORF was separated into four fragments overlapping by at least 20  
127 bp (approximately 400~500 bp) for amplification. The primers are listed in Table 1.  
128 The purified DNA was diluted 1000 times and used as a template. The amplification  
129 mixture was the same as described above except that the primers were 0.15  $\mu\text{M}$ . The  
130 cycling conditions were denaturation at 94°C for 2 min, followed by 30 cycles of  
131 98°C for 10 s, 55°C for 30 s, and 68°C for 30 s. The size of all the products was  
132 verified by 2% agarose gel electrophoresis, and the products were gel purified. All  
133 purified amplicons were stored at -20°C for further processing.



134 **Table 1. The primers for *tprK* amplification and sequencing**

| Primer                | Purpose                                | Sequence (5'→3')     |
|-----------------------|----------------------------------------|----------------------|
| <i>tprK</i> -S        | Amplification of <i>tprK</i> ORF       | ACCGGGCATGAATTTTCTTT |
| <i>tprK</i> -As       |                                        | GTAGGCCCCATAACAGTGCA |
| <i>tprK</i> -frag1-S  | Amplification of <i>tprK</i> fragment1 | ATGATTGACCCATCTGCCAC |
| <i>tprK</i> -frag1-As |                                        | GTAGGCCCCATAACAGTGCA |
| <i>tprK</i> -frag2-S  | Amplification of <i>tprK</i> fragment2 | GGTGGAGCAAAGTTTGACAC |
| <i>tprK</i> -frag2-As |                                        | TTAATGTATTCCTGCACGCC |
| <i>tprK</i> -frag3-S  | Amplification of <i>tprK</i> fragment3 | GAAGATGGCGTGCAGGAATA |
| <i>tprK</i> -frag3-As |                                        | TCAACACCCAAATCAAGACC |
| <i>tprK</i> -frag4-S  | Amplification of <i>tprK</i> fragment4 | TATTAAGCTCGAAACCAAGG |
| <i>tprK</i> -frag4-As |                                        | CCAAATCAAGCGACATGCCC |
| M13forward            | Sequencing                             | CTGGCCGTCGTTTTAC     |
| M13 reverse           |                                        | CAGGAAACAGCTATGAC    |

135

## 136 **Library construction and next-generation sequencing**

137 Library construction and sequencing were performed by the Sangon Biotech Company  
138 (Shanghai, China) on the MiSeq platform (Illumina, San Diego, CA, USA) in paired-end  
139 bi-directional sequencing (2×300 bp) mode. FastQC  
140 (<http://www.bioinformatics.babraham.ac.uk/project/fatsqc/>) and FASTX  
141 ([http://hannonlab.cshl.edu/fastx\\_toolkit](http://hannonlab.cshl.edu/fastx_toolkit)) tools were applied to check and improve the quality  
142 of the raw sequence data, respectively. The final reads collected from 14 patients were  
143 compared with the *tprK* of the Seattle Nichols strain (GenBank accession number  
144 AF194369.1) using Bowtie 2 (version 2.1.0).

145 An in-house Perl script was developed and applied to specifically capture DNA sequences  
146 within seven regions of 14 strains from raw data, both forward and reverse, as previously  
147 reported [18]. Briefly, the user-defined strings that matched the conserved sequence flanking  
148 the variable regions were used to catch the variable sequences. The defined strings referred to  
149 the mapping result of the reference and should be as long as necessary to ensure specificity  
150 (approximately 12-16 bp). Thus, the exact number of distinct sequences within seven regions  
151 across all strains was acquired. The intrastrain heterogeneous sequences were valid if the  
152 following conditions were simultaneously supported: 1) the number of the captured sequence  
153 was at least fifty reads and 2) the less frequent sequence displayed a frequency above 1%.  
154 Then, the relative frequency of the sequences within each variable region was calculated.

## 155 ***TprK* analysis by clone-based Sanger sequencing**

156 An aliquot of DNA was also used for the amplification of the *tprK* full ORF according to the  
157 procedure described previously [11]. The purified amplicons were cloned into the pCR-2.1  
158 TOPO vector (Invitrogen, Carlsbad, CA, USA) and were used to transform TOP10 competent  
159 *Escherichia coli* according to the manufacturer's instructions. Approximately 10 clone  
160 plasmids from each sample were randomly selected and sequenced; each clone was

161 sequenced not only in both directions with the M13 forward and reverse primers but also in  
162 the middle with the appropriate primers for a third reaction to ensure accuracy (Table 1). All  
163 sequencing was accomplished by the Bioray Biotechnology Company (Xiamen, China). The  
164 sequences within each intrastrain variable region were analysed using the BioEdit Sequence  
165 Alignment Editor Program ([www.mbio.ncsu.edu/BioEdit/bioedit.html](http://www.mbio.ncsu.edu/BioEdit/bioedit.html)).

166

## 167 **Results**

### 168 **1. Description of clinical samples and *tprK* sequencing by NGS**

169 The samples (N=14) were collected from patients diagnosed with primary syphilis at  
170 Zhongshan Hospital, Xiamen University. The clinical data of patients are shown in Table 2.  
171 The qPCR data of *Tp0574* showed that the number of treponemal copies in each clinical  
172 sample was eligible for the amplification of the *tprK* full ORF. The median sequencing depth  
173 of the *tprK* segment samples ranged from 10568.99 to 56676.38 and the coverage ranged  
174 from 99.34% to 99.61%, showing high homogeneity with the *tprK* gene of the Seattle  
175 Nichols strain.

176

177

178 **Table 2. Description of clinical samples and *tpoK* sequencing by NGS**

| 179 | Isolate | Gender | Age    | Serum RPR | Serum | Dark field | <i>T. pallidum</i> genome | Total reads | On-target | Mean coverage |
|-----|---------|--------|--------|-----------|-------|------------|---------------------------|-------------|-----------|---------------|
| 180 |         |        | (year) | titer     | TPPA  | microscopy | copies by <i>Tp0574</i>   |             | reads (%) | of depth      |
| 181 | X-1     | Male   | 45     | 1:16      | +     | Positive   | 8.2E+03                   | 357382      | 99.41     | 51967.28      |
| 182 | X-2     | Male   | 27     | 1:16      | +     | Positive   | 8.82E+04                  | 340240      | 99.47     | 49660.18      |
| 183 | X-3     | Male   | 62     | 1:16      | +     | Positive   | 4.55E+04                  | 398898      | 99.41     | 56676.38      |
| 184 | X-4     | Male   | 65     | 1:4       | +     | Positive   | 1.15E+04                  | 365060      | 99.34     | 52742.09      |
| 185 | X-5     | Male   | 76     | 1:16      | +     | Positive   | 5.73E+04                  | 363940      | 99.61     | 52960.83      |
| 186 | X-6     | Male   | 64     | 1:32      | +     | Positive   | 2.33E+02                  | 106934      | 99.37     | 14249.15      |
| 187 | X-7     | Female | 56     | 1:16      | +     | Positive   | 1.26E+04                  | 114012      | 99.37     | 15579.12      |
| 188 | X-8     | Male   | 46     | 1:4       | +     | Positive   | 1.41E+04                  | 103280      | 99.43     | 12951.11      |
| 189 | X-9     | Male   | 40     | 1:4       | +     | Positive   | 1.39E+03                  | 119552      | 99.43     | 15864.28      |
| 190 | X-10    | Male   | 66     | 1:32      | +     | Positive   | 9.17E+03                  | 114064      | 99.37     | 14927.08      |
| 191 | X-11    | Male   | 44     | 1:2       | +     | Positive   | 2.67E+02                  | 94572       | 99.50     | 12935.89      |
| 192 | X-12    | Male   | 39     | -         | +     | Positive   | 6.40E+03                  | 114588      | 99.43     | 14944.66      |
| 193 | X-13    | Male   | 63     | 1:16      | +     | Positive   | 2.02E+02                  | 118634      | 99.37     | 15013.54      |
| 194 | X-14    | Male   | 61     | 1:1       | +     | Positive   | 1.16E+03                  | 82812       | 99.37     | 10568.99      |

195

196 Abbreviations: NGS, next generation sequencing; RPR, reactive plasma reagin; TPPA, *T. pallidum* particle agglutination; +, positive; -, negative.

197

198

## 199 **2. Sequence variability of *tprK* directly from primary syphilis samples**

200 **The number and length variation of distinct sequences in seven regions** According to the  
201 strategy, we extracted sequences within seven V regions to evaluate the sequence variability  
202 of *tprK* directly from primary syphilis samples. Altogether, 335 distinct nucleotide sequences  
203 were captured. The number of distinct sequences in the seven regions ranged from 21-76,  
204 with the highest number in V6 and the lowest in V1 across all samples (Fig 1). The length of  
205 the captured sequences within each region was also found to be variable, particularly in V3,  
206 V6 and V7, with 11 or 12 forms. In contrast, the length of the sequence in V5 had only two  
207 forms, namely, 84 bp and 90 bp. When the length of all sequences within each sample was  
208 calculated, the length of all distinct sequences differed by 3 bp or multiples of 3 bp.  
209 Interestingly, although the lengths of V3, V6 and V7 were particularly variable across all  
210 populations, these lengths continued to change by 3 bp. In this regard, the lengths of V1, V4  
211 and V5 appeared to vary in intervals of 6 bp.

212 **The proportion distribution of distinct sequences in seven regions** The captured  
213 sequences were ranked by relative frequency within each V region of each strain. As Fig 2a  
214 shows, there was a predominant sequence in each region of all samples directly from primary  
215 syphilis patients, and the proportion of this sequence was almost 80%. It is worth noting that  
216 the frequency of the predominant sequence in some V regions of 4 samples (X-6, 8, 10, 13)  
217 was lower than 60%. In total, the frequency decrease appeared in the V2, V5, V6 and V7  
218 regions, and the frequency in V6 of X-6 was even lower at 20.8%.

219 Apart from the detected predominant sequence within seven V regions, there was still a  
220 mixture of minor variants in each region. To investigate the relative frequency distribution of  
221 minor variants, we used three thresholds to explore the characteristics (Fig 2b). The major  
222 proportion of the variants in primary syphilis samples was in the 1-5% (181/237) range, and

223 the lowest was in the 10-60% (22/237) range. At the two thresholds (5-10% and 10-60%), the  
224 observed variants were all mainly in V2, V5, V6 and V7 and from 4 samples (X-6, 8, 10, 13).  
225 This corresponded to the lower proportion of their predominant sequences.

226

227 **Fig 1. The varied length forms of distinct sequences within each region of *tprK*.** The  
228 varied length forms within each V region are presented as the frequencies in each region and  
229 are filled with the gradient colour. All distinct sequences captured for each region are also  
230 shown above the V region.

231

232 **Fig 2. The proportion distribution of distinct sequences within each V region of *tprK*.**

233 (A) The dots indicate the relative frequency of identified distinct sequences within each V  
234 region of *tprK* across all 14 primary clinical samples, and the colour specifies the strain. (B)  
235 The graph shows the number of minor variants within each V region from all strains. The  
236 three thresholds (1-5%, 5-10% and 10-60%) are characterized by three different shapes, and  
237 the colour specifies the strain.

238

### 239 **3. Comparison with the heterogeneity of the clones within the population**

240 Because previous studies were mainly based on the clone-based Sanger approach, we also  
241 applied this approach to analyse the *tprK* gene in these 14 strains and then compared the  
242 results with those of the NGS. Ten clones of each sample were obtained and identified by  
243 Sanger sequencing. Among the ten sequences, the predominant sequence within each V  
244 region of the primary syphilis samples was observed. The observed predominant sequence  
245 was consistent with the sequences obtained by NGS, such as in the strain of X-2 (Fig 3).  
246 However, where the frequency of the predominant sequence declined, especially when the  
247 frequency was less than 30%, for example, in the case of V6 in X-8, it became too ambiguous

248 to distinguish the predominant sequences (S1 Fig). In all clones, the sequence was nearly  
249 undetectable for the minor variants with a frequency of 1-5%.

250

251

252 **Fig 3. Predominant sequences within seven V regions identified by NGS compared to**  
253 **the results obtained by clone-based Sanger sequencing in this study.** The alignment was  
254 performed on the X-2 strain as a representative sample. The identical nucleotides are shown  
255 on dots, and gaps in the sequence are shown by dashes.

256

#### 257 **4. Inter-population redundancy of the deduced amino acid sequence**

258 A total of 335 nucleotide sequences were translated into amino acid sequences *in silico*. Ten  
259 sequences (10/335) were found to be synonymous, and at least 325 unique amino acid  
260 sequences were obtained. Unexpectedly, no sequence yielded a *tprK* frame shift or premature  
261 termination. When distinct sequences within each V region of all strains were compared, a  
262 scenario of sequence consistency was found. As Fig 4 shows, V1 and V4 presented a strong  
263 shared sequence capacity. The sequence IASDGGAIKH in V1 was observed in five strains  
264 (5/14) and DVGHKKENAANVNGTVGA in V4 was shared across seven strains (7/14).  
265 However, the parallel sequences in V3 and V6 did not seem as significant as in other V  
266 regions, especially in V6.

267 To further explore whether the shared scenario was usually displayed by the predominant  
268 sequence across all the strains, we involved only the predominant sequence in the V region of  
269 each sample, which was represented by the bold arc in Fig 4, and found that V1 and V4 still  
270 presented similar shared sequence abilities despite the decreased redundant sequences. The  
271 occurrence of the consistent sequence in V1 and V4 could reach five strains and six strains,  
272 respectively. For the V3 and V6 regions, which were rarely consistent with sequences, the  
273 shared sequence in V3 occurred only between two strains, and there was no consistent

274 sequence found in V6. Meanwhile, there was also no redundant sequence observed in V7.

275

276 **Fig 4. The scenario of redundant *tprK* amino acid sequences between all 14 primary**  
277 **syphilis clinical samples.** The 14 strains are specified by coloured solid circles, and the  
278 predominant sequence and minor variants within each V region of one strain are represented  
279 by a bold arc and thin arcs, respectively. Each grey circle indicates the occurrence of  
280 sequence consistency between the strains.

281

## 282 **Discussion**

283 Due to the inability to long term culture *T. pallidum in vitro*, research on this pathogen has  
284 been greatly hindered. The whole genome sequencing of the Nichols strain of *T. pallidum*  
285 provides a new perspective for the study of treponemal genes and proteins. Among these  
286 genes, *tprK* has been extensively studied because of its highly variable antigenic profile. It  
287 could effectively compromise the immunological function of specific antibodies generated by  
288 the host [14, 24-26] and cause immune evasion, thereby further leading to the development of  
289 late syphilis, neurosyphilis or serofast. Hence, intensive studies on the heterogeneity of *tprK*,  
290 especially in the context of human infection, would contribute to a deep understanding of the  
291 pathogenesis of syphilis.

292 In the present study, we performed NGS, a more sensitive and reliable approach, to gain  
293 better insight into the profile of *tprK* in primary syphilis patients. Overall, there was a wide  
294 sequence mixture focused on seven V regions of *tprK* in primary syphilis clinical samples.  
295 Among the seven V regions, V1 and V6 were known to have the lowest and highest  
296 variability, respectively [18, 27]. Our results also corroborated this feature in primary syphilis  
297 infection, in which the highest distinct number was found in V6 and the lowest distinct  
298 number was found in V1 (Figs 1 and 2a). Although *tprK* was revealed to have rampant



299 genetic diversity within each strain [11, 12, 28], little is known about the exact proportion of  
300 these variant sequences within one strain. It is an advantage of NGS to fully discover the  
301 variants and determine the frequency [29, 30]. In this study, by using an in-house Perl script,  
302 we were able to retrieve the variants within the regions of each strain and calculate the  
303 relative frequency of the variants, thus disclosing the proportion of these variant sequences in  
304 primary syphilis patients. As shown in Fig 2a, there was a predominant sequence (the  
305 proportion above 80%) within each V region across all the strains.

306 In addition to the predominant sequence within each region, there was also a mixture of  
307 minor sequences (Fig 2a). Moreover, these minor variants were found to be mostly  
308 distributed at a frequency of 1-5% (Fig 2b), which was extremely below the detection limit  
309 for Sanger sequencing [31]. These results demonstrated that although the diversity of the V  
310 regions in antigen-coding *tprK* in primary syphilis infection was also presented to be wild,  
311 the V regions generally maintained their high proportion pathogenic sequence and numerous  
312 low-frequency minor variants. It is worth noting that the proportion of predominant  
313 sequences in some V regions of 4 samples (X-6, 8, 10, 13) was apparently lower than in  
314 others, and almost all the minor sequences in the 5-10% and 10-60% ranges were from these  
315 four samples, more specifically, mostly from the V2, V5, V6 and V7 regions (Fig 2). This  
316 result suggested that with the progression of disease or with increasing immunity, some V  
317 regions (V2, V5, V6 and V7) began to change. As a result, the frequency of the predominant  
318 sequence was decentralized. Instead, the frequency of a minor variant (or a new variant)  
319 gradually increased and further promoted the genetic diversity of *tprK* to escape immune  
320 clearance. Additionally, among the observed four regions, the frequency of the predominant  
321 sequence in V6 was particularly low (Fig 2a), suggesting that V6 may be the first affected  
322 region and is involved in immune evasion during the course of infection [14, 18].

323 We also applied the clone-based Sanger approach to analyse the *tprK* in primary syphilis

324 patients in comparison with the results of NGS. As described in a previous study [32], the  
325 Sanger results generally displayed the predominant sequence within each region, which was  
326 consistent with the sequence found during NGS (Fig 3). However, for the lower frequency  
327 variants within the region, it became difficult to distinguish the predominant sequence, and  
328 we were unable to identify all the minor variants (S1 Fig). An increase in the number of  
329 clones selected would potentially alleviate this problem, but it would take more time and  
330 money. Additionally, the minor variants at a frequency of 1-5% were nearly undetectable in  
331 all selected clones. Therefore, use of the clone-based Sanger approach would lose much  
332 information about the complete profile of *tprK*, particularly in primary syphilis clinical  
333 samples in which *tprK* contained numerous low-frequency variants.

334 In this study, except for the distinct variations in *tprK* sequences, we found that the  
335 heterogeneity in *tprK* also presented in length (Fig 1). More length forms appeared in V3, V6  
336 and V7, which was similar to the findings of Pinto et al. [18], demonstrating that the  
337 variations in these three regions could more easily cause changes in length. Despite this, the  
338 length forms were too far away to match with the number of sequences within each region;  
339 that is, the variants within each region were of the same length, but the context still had a  
340 considerable difference. For example, there were many different sequences observed in V5,  
341 but there were only two forms of length which was also observed in previous study [14]. This  
342 result indicated that the variants of *tprK* preferred a conversion without changing the initial  
343 length of the V region. Additionally, it was interesting that the length of all distinct sequences  
344 differed only by 3 bp or multiples of 3 bp, and previous research data also supported this  
345 pattern change [14, 18]. A multiple of 3 bp change pattern just matched with the triplet codon  
346 in protein coding, which has made us think about this feature probably explain why it is rare  
347 to uncover a *tprK* frame shift. It also suggests that the rampant diversity of *tprK* is regulated  
348 by a strict gene conversion mechanism.

349 Another noteworthy finding was the shared amino acid sequences across all the strains  
350 from the primary syphilis patients, which has also been observed in previous research [18,  
351 27]. In our study, when all the distinct amino acid sequences within each region were aligned,  
352 at least half of the strains had sequences shared by other strains (Fig 4), which was similar to  
353 previous findings [18]. However, when only the predominant sequence within each region  
354 was analysed, *tprK* inter-population redundancy remained at a high level in only V1 and V4,  
355 in contrast to other regions, especially V6 and V7. This result suggested that the redundant  
356 sequences in V1 and V4 between strains were the ones that mostly dominated within a single  
357 strain. As the same antigenic sequences originated throughout the evolution of *T. pallidum* in  
358 different patients, this may reflect that the sequences become the best antigenic profiles to  
359 address the immune response of the host. The high stability of inter-population redundancy in  
360 V1 and V4 found in primary syphilis may confirm that the shared antigenic sequences in V1  
361 and V4 play a critical role in *T. pallidum* virulence. In previous research [24, 25, 33], the  
362 molecular localization in the N-terminal region of *tprK* displayed promising partial protection  
363 in a rabbit model. Therefore, the highly stable shared peptide of V1 and V4 across all the  
364 strains would also likely be a potential target for vaccine development.

365 Finally, the limitations of our research should be discussed. First, the findings reported  
366 above lacked data about these clinical strains propagated by rabbits and could not directly  
367 highlight the difference from the naïve characteristics of *tprK* in human infection. This  
368 remains to be confirmed by animal experiments with NGS in the future. In addition, in this  
369 study, the number of clones selected for Sanger sequencing might be insufficient, although  
370 the current data were enough to verify the accuracy and reliability of our NGS results.

371 In summary, the characteristic profile of *tprK* in primary syphilis patients was unveiled to  
372 generally contain a high proportion sequence and many low-frequency minor variants within  
373 each V region. The variations in V regions were regulated by a strict gene conversion

374 mechanism to keep the length differences to 3 bp or multiples of 3 bp. The findings could  
375 provide important information for further exploration of the role of *tprK* in immune evasion  
376 and persistent infection with syphilis. Furthermore, the peptide of each V region, especially  
377 the highly conserved peptide found in this study, could serve as a database of B cell epitopes  
378 of TprK for human immunological studies in the future.

379

## 380 **Supporting information**

381 **S1 Fig. Comparison of the results of NGS and clone-based Sanger sequencing in V6 of**  
382 **the X-8 strain.** RF values indicate the relative frequency of each sequence.

383 **S1 Table. The nucleotide sequences within the seven variable regions (V1-V7) of *tprK***  
384 **captured directly from 14 primary syphilis clinical samples.**

385 **S2 Table. The amino acid sequences within the seven variable regions (V1-V7) of *tprK***  
386 **captured directly from 14 primary syphilis clinical samples.** \* indicates synonymous  
387 nucleotide sequences within the same strain.

388

## 389 **References**

- 390 1. Smolak A, Rowley J, Nagelkerke N, Kassebaum NJ, Chico RM, Korenromp EL, et al.  
391 Trends and Predictors of Syphilis Prevalence in the General Population: Global Pooled  
392 Analyses of 1103 Prevalence Measures Including 136 Million Syphilis Tests. *Clinical*  
393 *infectious diseases* : an official publication of the Infectious Diseases Society of America.  
394 2018;66(8):1184-91. Epub 2017/11/15. doi: 10.1093/cid/cix975. PubMed PMID: 29136161;  
395 PubMed Central PMCID: PMCPmc5888928.
- 396 2. Everall I, Sanchez-Buso L. Bringing *Treponema* into the spotlight. *Nature reviews*  
397 *Microbiology*. 2017;15(4):196. Epub 2017/03/14. doi: 10.1038/nrmicro.2017.23. PubMed  
398 PMID: 28286342.

- 399 3. Fraser CM, Norris SJ, Weinstock GM, White O, Sutton GG, Dodson R, et al. Complete  
400 genome sequence of *Treponema pallidum*, the syphilis spirochete. *Science* (New York, NY).  
401 1998;281(5375):375-88. Epub 1998/07/17. PubMed PMID: 9665876.
- 402 4. Matejkova P, Strouhal M, Smajs D, Norris SJ, Palzkill T, Petrosino JF, et al. Complete  
403 genome sequence of *Treponema pallidum* ssp *pallidum* strain SS14 determined with  
404 oligonucleotide arrays. *Bmc Microbiology*. 2008;8. PubMed PMID:  
405 WOS:000256297900001.
- 406 5. Smajs D, Zbanikova M, Strouhal M, Cejkova D, Dugan-Rocha S, Pospisilova P, et al.  
407 Complete Genome Sequence of *Treponema paraluis-cuniculi*, Strain Cuniculi A: The Loss of  
408 Infectivity to Humans Is Associated with Genome Decay. *PloS one*. 2011;6(5). PubMed  
409 PMID: WOS:000291097600063.
- 410 6. Cejkova D, Zbanikova M, Chen L, Pospisilova P, Strouhal M, Qin X, et al. Whole  
411 Genome Sequences of Three *Treponema pallidum* ssp *pertenue* Strains: Yaws and Syphilis  
412 *Treponemes* Differ in Less than 0.2% of the Genome Sequence. *Plos Neglected Tropical*  
413 *Diseases*. 2012;6(1). PubMed PMID: WOS:000300416100021.
- 414 7. Petrosova H, Zbanikova M, Cejkova D, Mikalova L, Pospisilova P, Strouhal M, et al.  
415 Whole genome sequence of *Treponema pallidum* ssp. *pallidum*, strain Mexico A, suggests  
416 recombination between yaws and syphilis strains. *PLoS Negl Trop Dis*. 2012;6(9):e1832.  
417 Epub 2012/10/03. doi: 10.1371/journal.pntd.0001832. PubMed PMID: 23029591; PubMed  
418 Central PMCID: PMC3447947.
- 419 8. Zbanikova M, Mikolka P, Cejkova D, Pospisilova P, Chen L, Strouhal M, et al.  
420 Complete genome sequence of *Treponema pallidum* strain DAL-1. *Standards in Genomic*  
421 *Sciences*. 2012;7(1):12-21. PubMed PMID: WOS:000314405900002.
- 422 9. Mikalova L, Strouhal M, Cejkova D, Zbanikova M, Pospisilova P, Norris SJ, et al.  
423 Genome Analysis of *Treponema pallidum* subsp. *pallidum* and subsp. *pertenue* Strains: Most

- 424 of the Genetic Differences Are Localized in Six Regions. PloS one. 2010;5(12). PubMed  
425 PMID: WOS:000285793200041.
- 426 10. Morgan CA, Molini BJ, Lukehart SA, Van Voorhis WC. Segregation of B and T cell  
427 epitopes of *Treponema pallidum* repeat protein K to variable and conserved regions during  
428 experimental syphilis infection. J Immunol. 2002;169(2):952-7. PubMed PMID:  
429 WOS:000176753500040.
- 430 11. Centurion-Lara A, Godornes C, Castro C, Van Voorhis WC, Lukehart SA. The tprK  
431 gene is heterogeneous among *Treponema pallidum* strains and has multiple alleles. Infect  
432 Immun. 2000;68(2):824-31. Epub 2000/01/20. PubMed PMID: 10639452; PubMed Central  
433 PMCID: PMCPmc97211.
- 434 12. Stamm LV, Bergen HL. The sequence-variable, single-copy tprK gene of *Treponema*  
435 *pallidum* Nichols strain UNC and Street strain 14 encodes heterogeneous TprK proteins.  
436 Infection and Immunity. 2000;68(11):6482-6. PubMed PMID: WOS:000090007000055.
- 437 13. Giacani L, Brandt SL, Puray-Chavez M, Reid TB, Godornes C, Molini BJ, et al.  
438 Comparative Investigation of the Genomic Regions Involved in Antigenic Variation of the  
439 TprK Antigen among *Treponemal* Species, Subspecies, and Strains. Journal of Bacteriology.  
440 2012;194(16):4208-25. PubMed PMID: WOS:000307198100007.
- 441 14. Centurion-Lara A, LaFond RE, Hevner K, Godornes C, Molini BJ, Van Voorhis WC, et  
442 al. Gene conversion: a mechanism for generation of heterogeneity in the tprK gene of  
443 *Treponema pallidum* during infection. Molecular Microbiology. 2004;52(6):1579-96.  
444 PubMed PMID: WOS:000221866300005.
- 445 15. Cox DL, Luthra A, Dunham-Ems S, Desrosiers DC, Salazar JC, Caimano MJ, et al.  
446 Surface immunolabeling and consensus computational framework to identify candidate rare  
447 outer membrane proteins of *Treponema pallidum*. Infect Immun. 2010;78(12):5178-94. doi:  
448 10.1128/IAI.00834-10. PubMed PMID: 20876295; PubMed Central PMCID:

- 449 PMCPMC2981305.
- 450 16. Reid TB, Molini BJ, Fernandez MC, Lukehart SA. Antigenic Variation of TprK  
451 Facilitates Development of Secondary Syphilis. *Infection and Immunity*.  
452 2014;82(12):4959-67. PubMed PMID: WOS:000346958400006.
- 453 17. Radolf JD, Deka RK, Anand A, Smajs D, Norgard MV, Yang XF. *Treponema pallidum*,  
454 the syphilis spirochete: making a living as a stealth pathogen. *Nature Reviews Microbiology*.  
455 2016;14(12):744-59. PubMed PMID: WOS:000388217400008.
- 456 18. Pinto M, Borges V, Antelo M, Pinheiro M, Nunes A, Azevedo J, et al. Genome-scale  
457 analysis of the non-cultivable *Treponema pallidum* reveals extensive within-patient genetic  
458 variation. *Nature Microbiology*. 2017;2(1). doi: 10.1038/nmicrobiol.2016.190. PubMed  
459 PMID: WOS:000396366300010.
- 460 19. Giacani L, Jeffrey BM, Molini BJ, Le HT, Lukehart SA, Centurion-Lara A, et al.  
461 Complete genome sequence and annotation of the *Treponema pallidum* subsp. *pallidum*  
462 Chicago strain. *J Bacteriol*. 2010;192(10):2645-6. Epub 2010/03/30. doi:  
463 10.1128/jb.00159-10. PubMed PMID: 20348263; PubMed Central PMCID:  
464 PMCpMc2863575.
- 465 20. Workowski KA, Bolan GA. Sexually Transmitted Diseases Treatment Guidelines, 2015.  
466 MMWR Recommendations and reports : Morbidity and mortality weekly report  
467 Recommendations and reports. 2015;64(RR-03):1-137. PubMed PMID: PMC5885289.
- 468 21. Janier M, Hegyi V, Dupin N, Unemo M, Tiplica GS, Potočnik M, et al. 2014 European  
469 guideline on the management of syphilis. *Journal of the European Academy of Dermatology*  
470 *and Venereology*. 2014;28(12):1581-93. doi: doi:10.1111/jdv.12734.
- 471 22. Tong ML, Zhao Q, Liu LL, Zhu XZ, Gao K, Zhang HL, et al. Whole genome sequence  
472 of the *Treponema pallidum* subsp. *pallidum* strain Amoy: An Asian isolate highly similar to  
473 SS14. 2017;12(8):e0182768. doi: 10.1371/journal.pone.0182768. PubMed PMID: 28787460.

- 474 23. Zhu XZ, Fan JY, Liu D, Gao ZX, Gao K, Lin Y, et al. Assessing effects of different  
475 processing procedures on the yield of *Treponema pallidum* DNA from blood. *Analytical*  
476 *biochemistry*. 2018;557:91-6. Epub 2018/07/25. doi: 10.1016/j.ab.2018.07.019. PubMed  
477 PMID: 30040912.
- 478 24. Centurion-Lara A, Castro C, Barrett L, Cameron C, Mostowfi M, Van Voorhis WC, et al.  
479 *Treponema pallidum* major sheath protein homologue Tpr K is a target of opsonic antibody  
480 and the protective immune response. *J Exp Med*. 1999;189(4):647-56. Epub 1999/02/17.  
481 PubMed PMID: 9989979; PubMed Central PMCID: PMCPmc2192927.
- 482 25. Morgan CA, Lukehart SA, Van Voorhis WC. Protection against syphilis correlates with  
483 specificity of antibodies to the variable regions of *Treponema pallidum* repeat protein K.  
484 *Infect Immun*. 2003;71(10):5605-12. doi: 10.1128/iai.71.10.5605-5612.2003. PubMed PMID:  
485 WOS:000185551200020.
- 486 26. LaFond RE, Molini BJ, Van Voorhis WC, Lukehart SA. Antigenic variation of TprK V  
487 regions abrogates specific antibody binding in syphilis. *Infection and Immunity*.  
488 2006;74(11):6244-51. PubMed PMID: WOS:000241600500025.
- 489 27. LaFond RE, Centurion-Lara A, Godornes C, Rompalo AM, Van Voorhis WC, Lukehart  
490 SA. Sequence diversity of *Treponema pallidum* subsp *pallidum* tprK in human syphilis  
491 lesions and rabbit-propagated isolates. *Journal of Bacteriology*. 2003;185(21):6262-8. doi:  
492 10.1128/jb.185.21.6262-6268.2003. PubMed PMID: WOS:000186037600005.
- 493 28. LaFond RE, Centurion-Lara A, Godornes C, Van Voorhis WC, Lukehart SA. TprK  
494 sequence diversity accumulates during infection of rabbits with *Treponema pallidum* subsp  
495 *pallidum* Nichols strain. *Infect Immun*. 2006;74(3):1896-906. doi:  
496 10.1128/iai.74.3.1896-1906.2006. PubMed PMID: WOS:000235817500052.
- 497 29. Ley TJ, Mardis ER, Ding L, Fulton B, McLellan MD, Chen K, et al. DNA sequencing of  
498 a cytogenetically normal acute myeloid leukaemia genome. *Nature*. 2008;456(7218):66-72.



- 499 Epub 2008/11/07. doi: 10.1038/nature07485. PubMed PMID: 18987736; PubMed Central  
500 PMCID: PMCPmc2603574.
- 501 30. Solmone M, Vincenti D, Prosperi MC, Bruselles A, Ippolito G, Capobianchi MR. Use of  
502 massively parallel ultradeep pyrosequencing to characterize the genetic diversity of hepatitis  
503 B virus in drug-resistant and drug-naive patients and to detect minor variants in reverse  
504 transcriptase and hepatitis B S antigen. *Journal of virology*. 2009;83(4):1718-26. Epub  
505 2008/12/17. doi: 10.1128/jvi.02011-08. PubMed PMID: 19073746; PubMed Central PMCID:  
506 PMCPmc2643754.
- 507 31. Palmer S, Kearney M, Maldarelli F, Halvas EK, Bixby CJ, Bazmi H, et al. Multiple,  
508 linked human immunodeficiency virus type 1 drug resistance mutations in  
509 treatment-experienced patients are missed by standard genotype analysis. *Journal of clinical  
510 microbiology*. 2005;43(1):406-13. Epub 2005/01/07. doi: 10.1128/jcm.43.1.406-413.2005.  
511 PubMed PMID: 15635002; PubMed Central PMCID: PMCPmc540111.
- 512 32. Pinto M, Borges V, Antelo M, Pinheiro M, Nunes A, Azevedo J, et al. Genome-scale  
513 analysis of the non-cultivable *Treponema pallidum* reveals extensive within-patient genetic  
514 variation. *Nat Microbiol*. 2016;2:16190. Epub 2016/10/18. doi:  
515 10.1038/nmicrobiol.2016.190. PubMed PMID: 27748767.
- 516 33. Morgan CA, Lukehart SA, Van Voorhis WC. Immunization with the N-terminal portion  
517 of *Treponema pallidum* repeat protein K attenuates syphilitic lesion development in the rabbit  
518 model. *Infect Immun*. 2002;70(12):6811-6. doi: 10.1128/iai.70.12.6811-6816.2002. PubMed  
519 PMID: WOS:000179377600039.
- 520

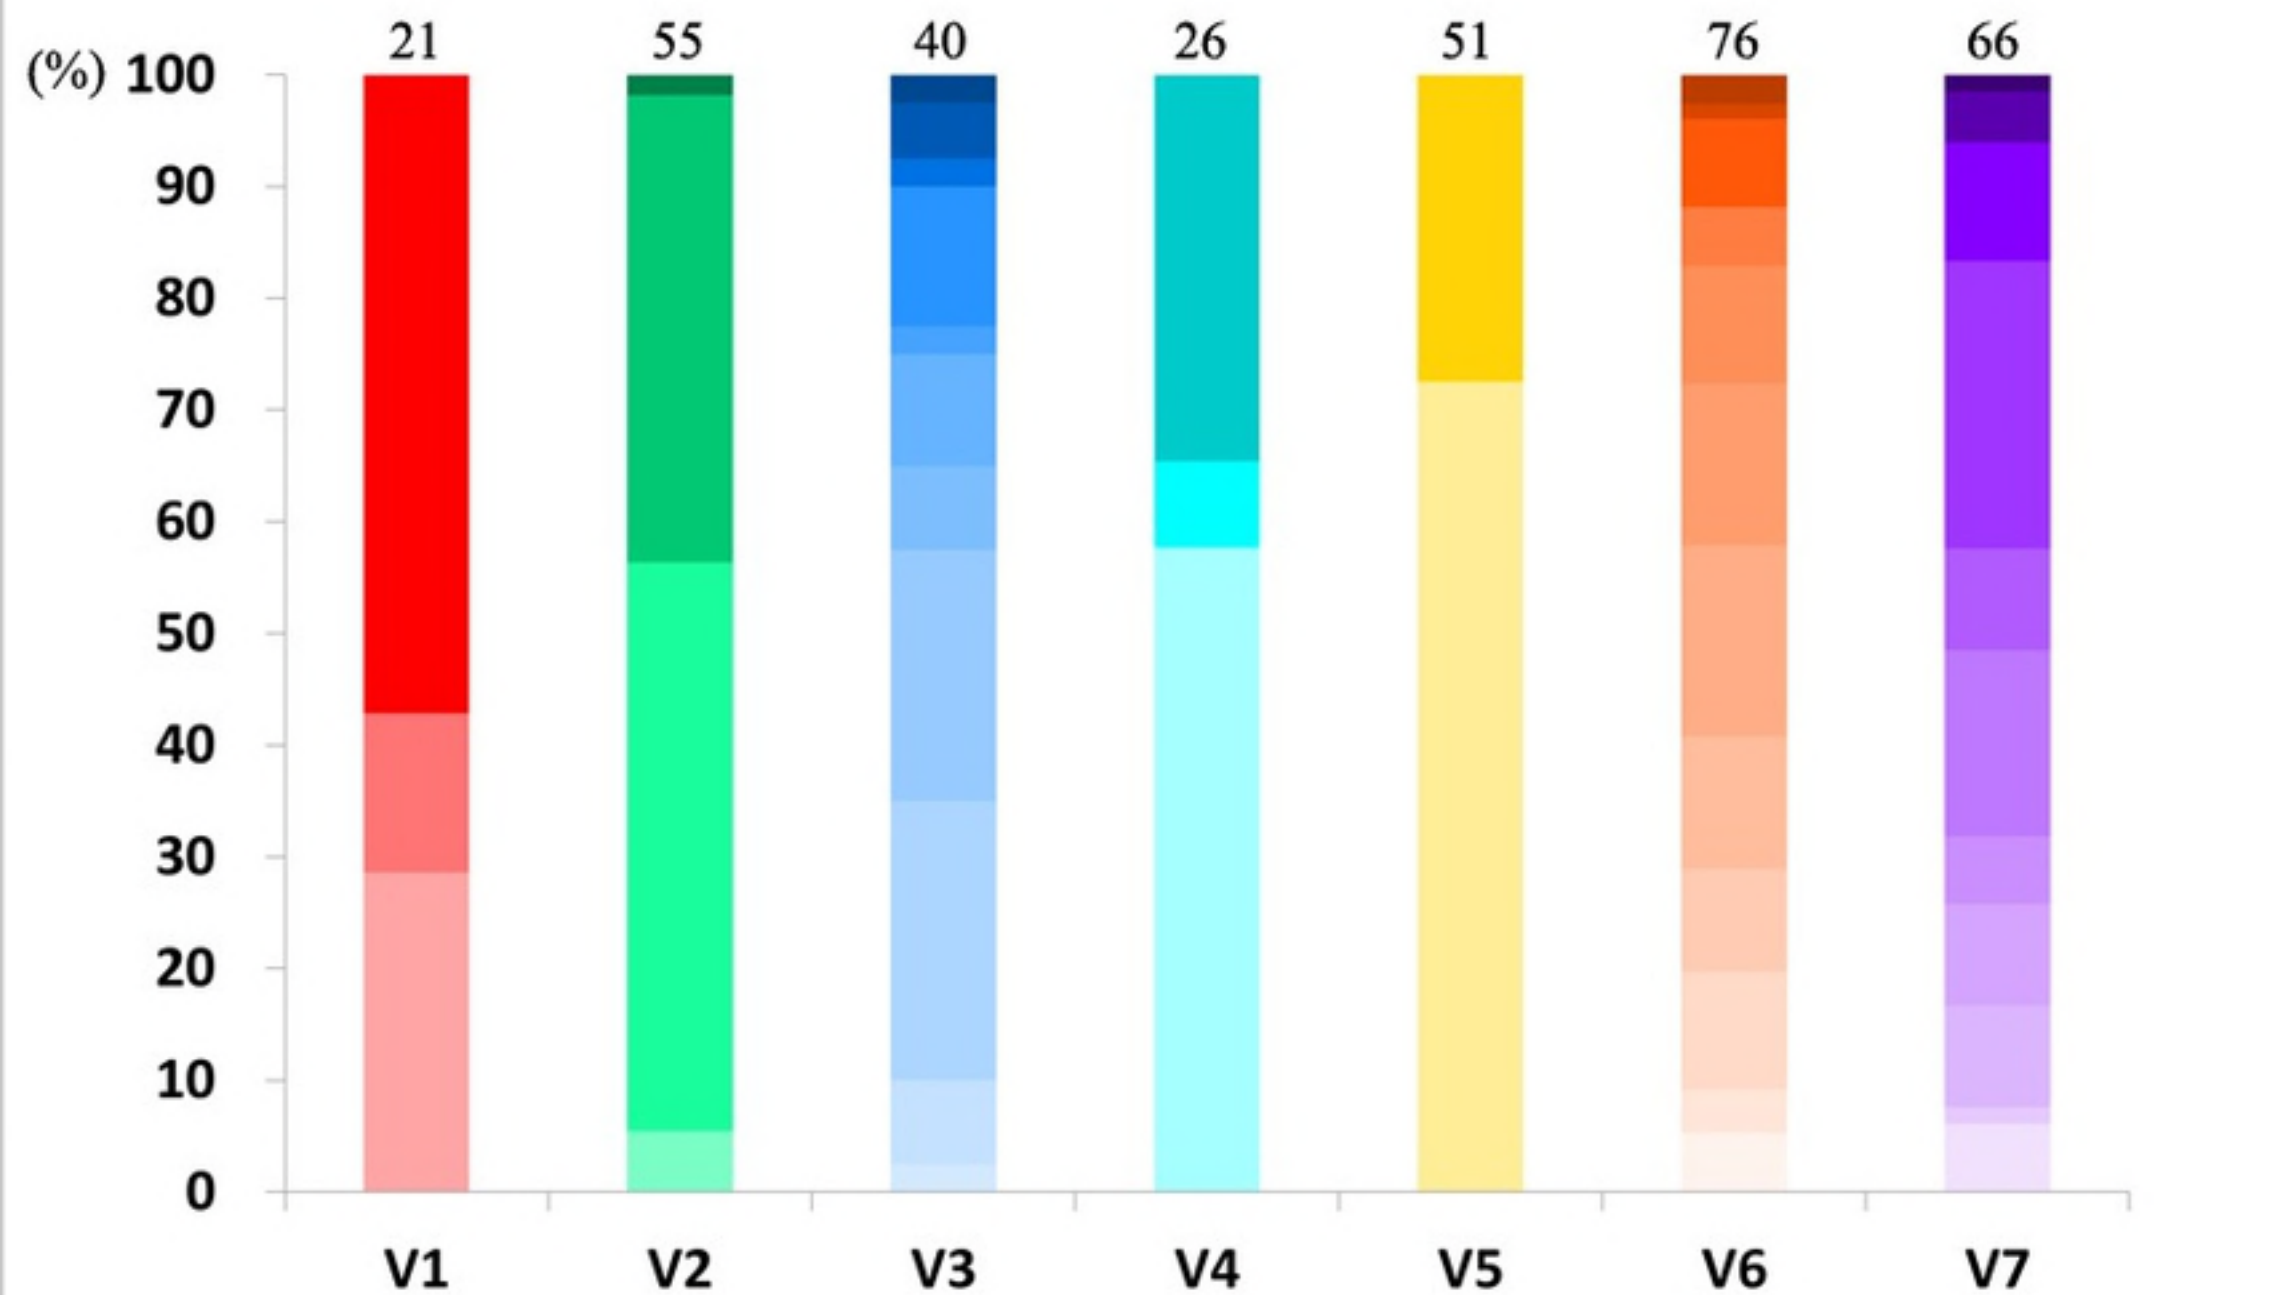

- 32 38 41 59 62 65 68 54 57 60 63 66 69 72 75 78
- 81 84 49 55 58 84 90 45 48 51 54 57 60 63 66 69
- 72 75 78 64 67 70 73 76 79 82 85 88 91 94

**A**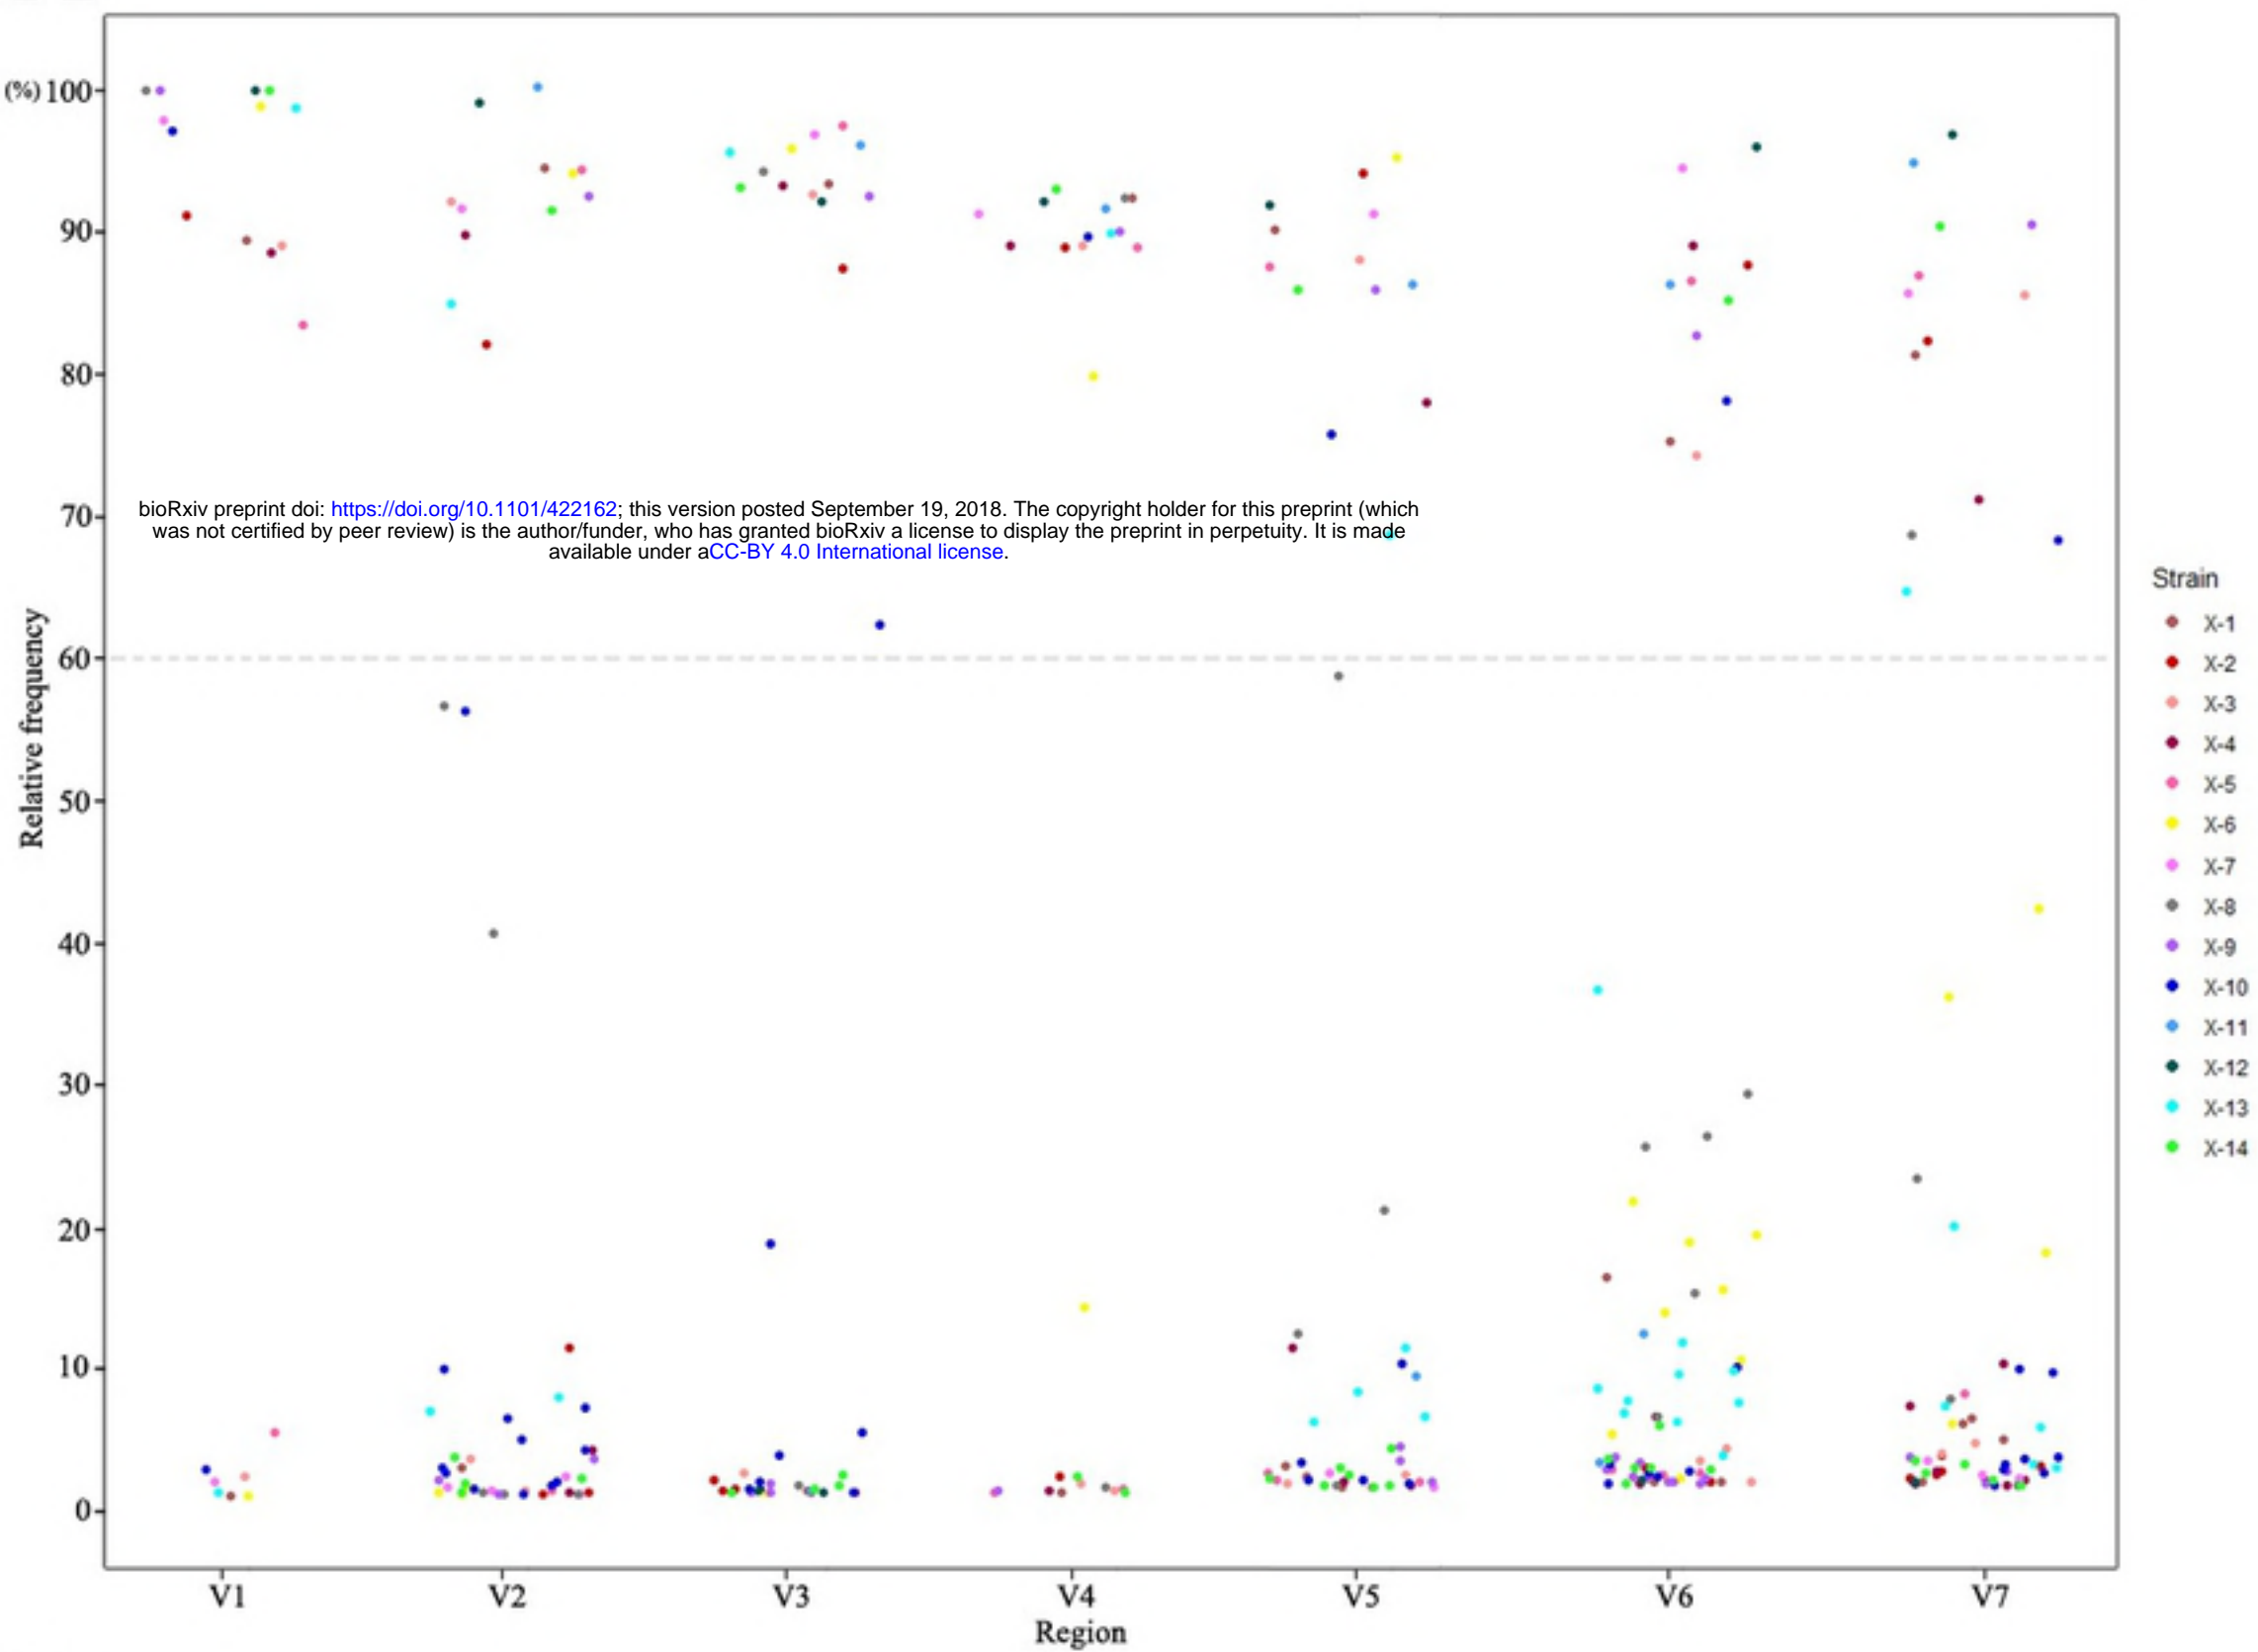**B**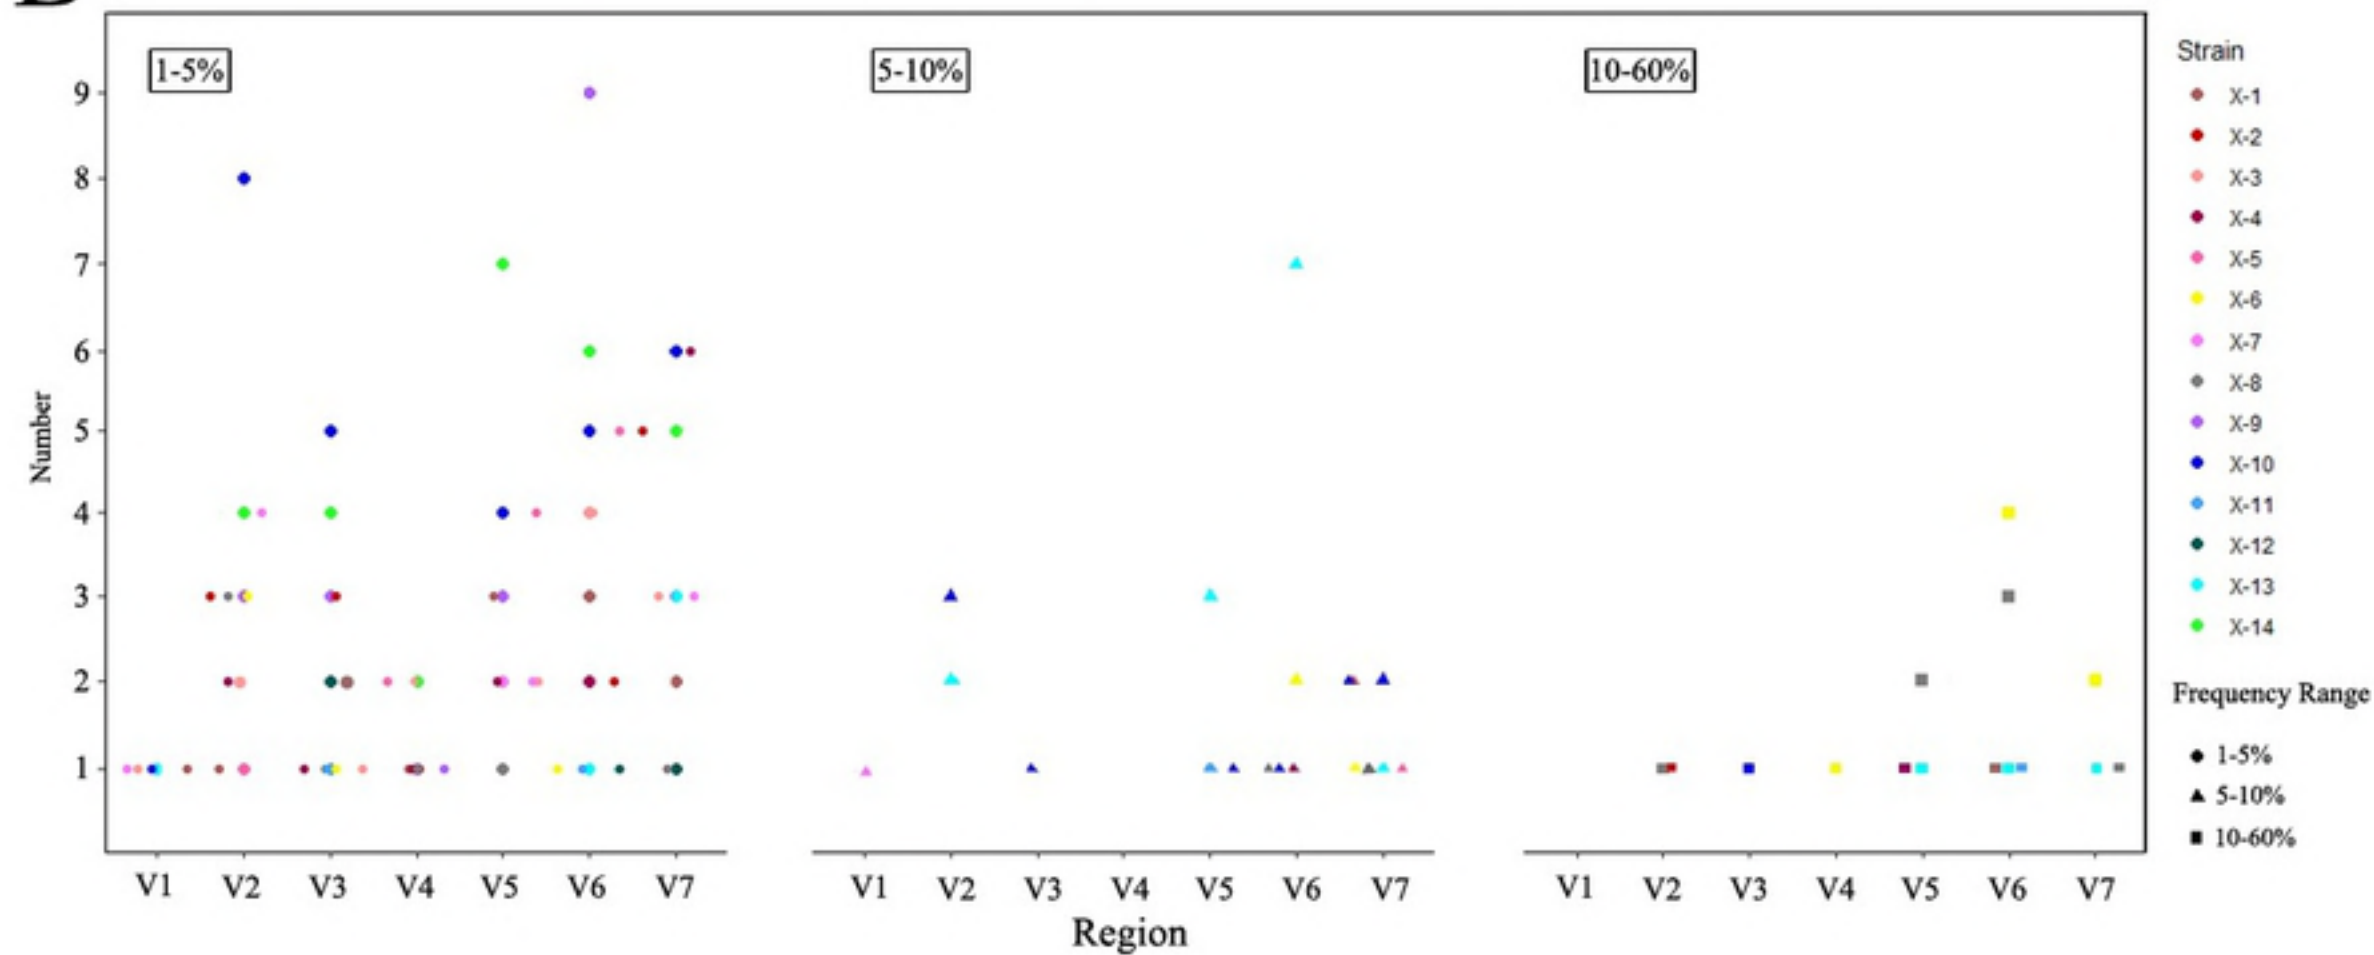

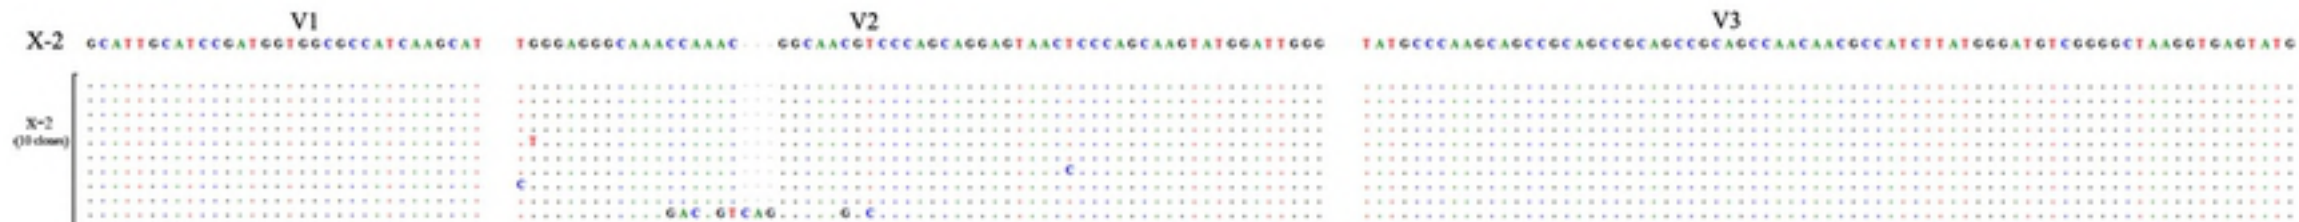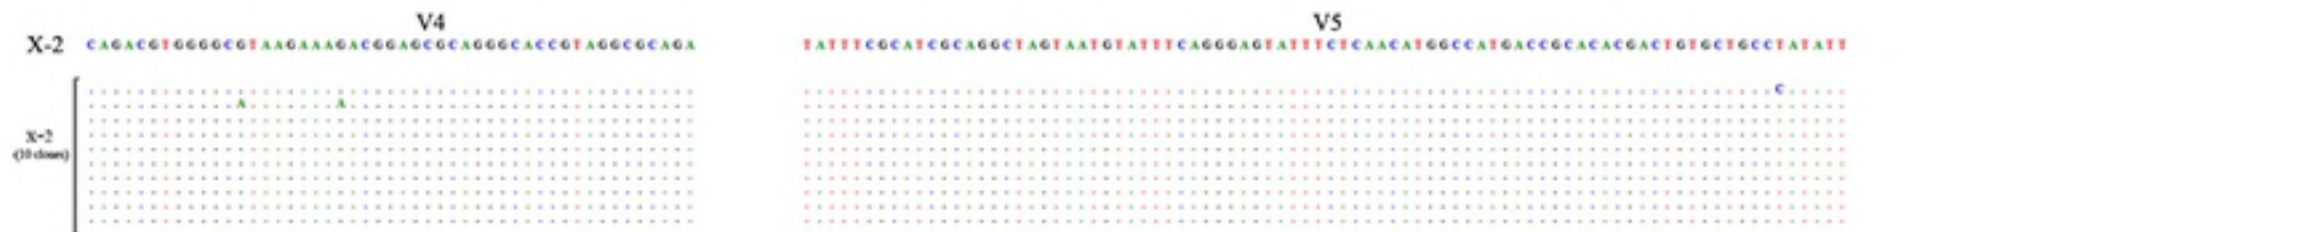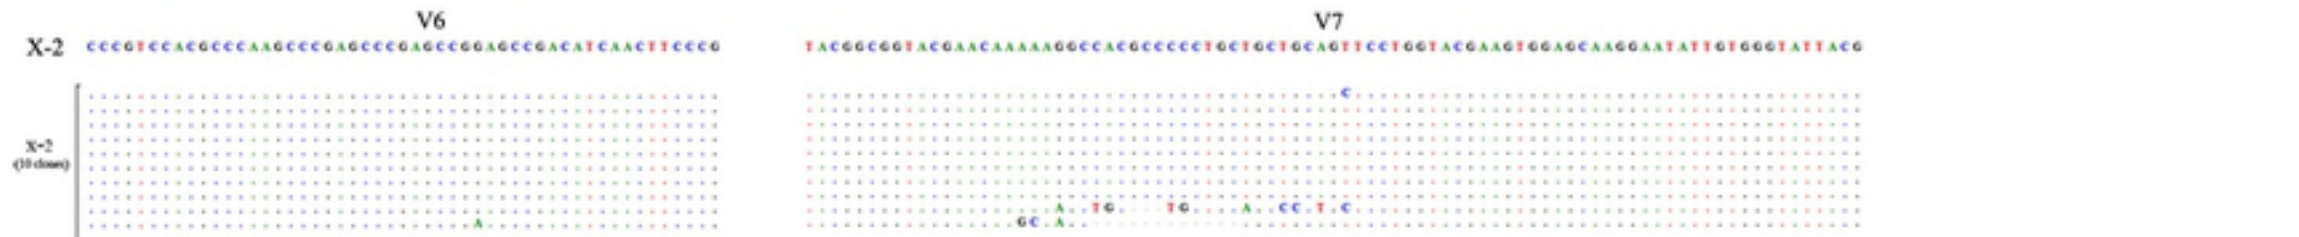

V1

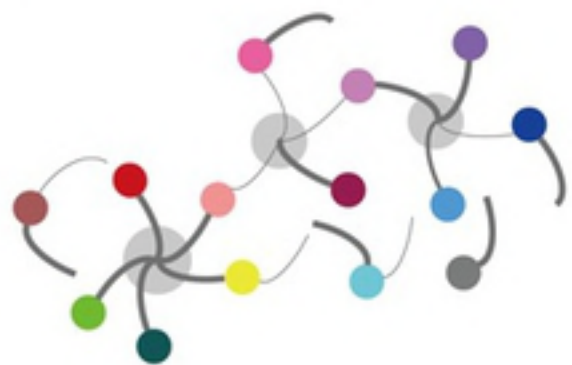

V2

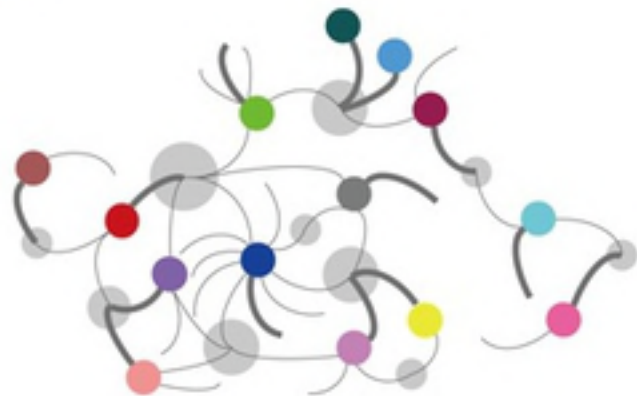

V3

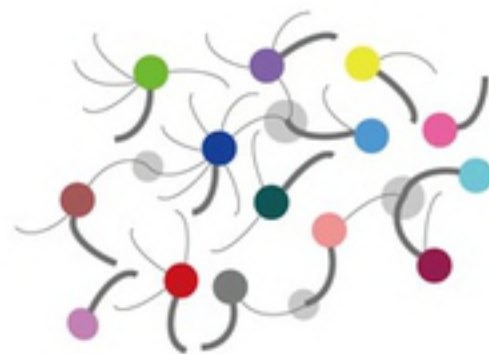

V4

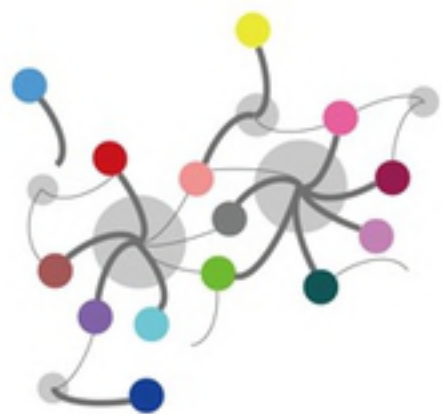

V5

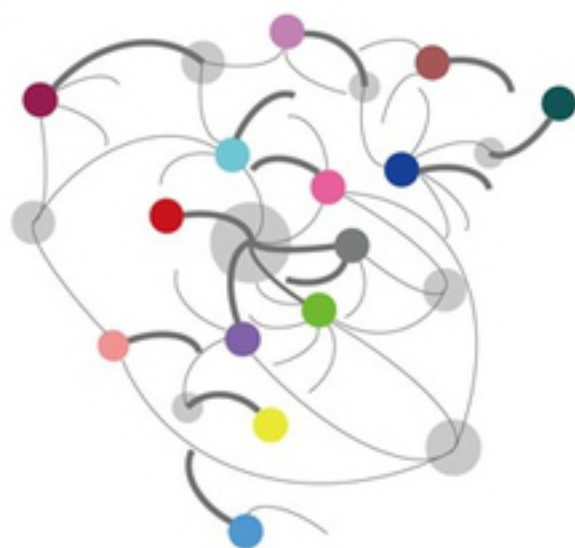

V6

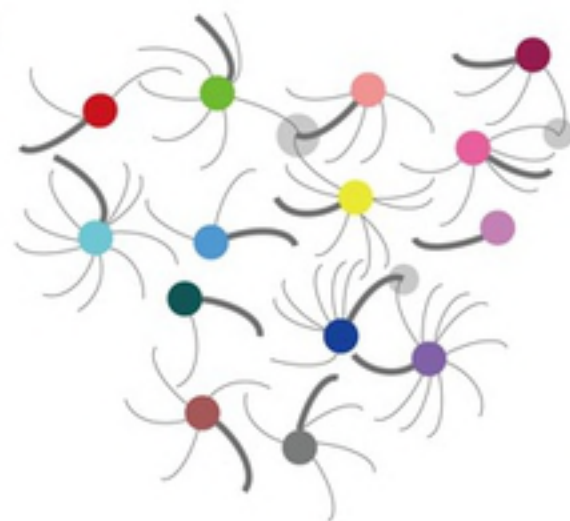

V7

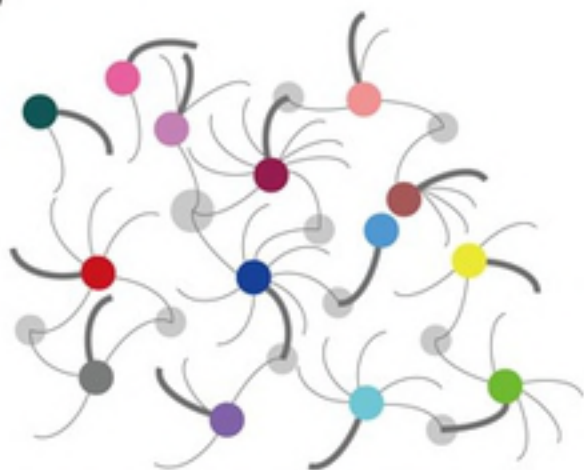

Strain

- X-1
- X-2
- X-3
- X-4
- X-5
- X-6
- X-7
- X-8
- X-9
- X-10
- X-11
- X-12
- X-13
- X-14
